# Supplementary material
Source: publisher figshare collection journal article supplement (https://frontiersin.figshare.com/ndownloader/files/14101490)
Supplement: Supplementary file 1 [file 14101490]

# Characterization of Engineering Properties of Active Soils Stabilized with Nanomaterial for Sustainable Infrastructure Delivery

Onuegbu O. Ugwu<sup>1</sup> (ORCID: 0000-0002-6746-1464) Amadise S. Ogboin<sup>2</sup> and Clifford U. Nwoji<sup>3</sup>

<sup>1</sup> Department of Civil Engineering, Alex Ekwueme Federal University Ndufu-Alike Ikwo (AE-FUNAI), Ebonyi State, Nigeria (**Email:** [onuegbu.ugwu@funai.edu.ng](mailto:onuegbu.ugwu@funai.edu.ng), [onuegbuugwu@gmail.com](mailto:onuegbuugwu@gmail.com), )

<sup>2</sup>Department of Civil Engineering, Niger Delta University (NDU), Wilberforce Island, Bayelsa State, Nigeria (**Email:** [amaogboserv@yahoo.com](mailto:amaogboserv@yahoo.com) )

<sup>3</sup> Department of Civil Engineering, University of Nigeria, Nsukka, Enugu State, Nigeria (**Email:** [clifford.nwoji@unn.edu.ng](mailto:clifford.nwoji@unn.edu.ng), [cunwoji@yahoo.com](mailto:cunwoji@yahoo.com) )

## APPENDIX

**TABLE A-1** Percentage changes in percent swell (%) and water absorption (source: analysis of laboratory results)

| SAMPLE | PERCENT IN SWELL (%) | CHANGE IN WATER ABSORPTION (%) |
|--------|----------------------|--------------------------------|
| Loc 1R | 0.00                 | 0.00                           |
| 1:250  | -9.93                | -53.87                         |
| 1:200  | -24.94               | -57.20                         |
| 1:150  | -38.01               | -65.31                         |
| 1:100  | -64.89               | -76.75                         |
| 1:50   | -69.73               | -83.39                         |
| Loc 2R | 0.00                 | 0.00                           |
| 1.250  | -21.96               | -16.78                         |
| 1.200  | -37.40               | -53.02                         |
| 1:150  | -56.56               | -58.39                         |
| 1:100  | -66.59               | -63.09                         |
| 1:50   | -68.50               | -67.79                         |
| Loc 3B | 0.00                 | 0.00                           |

|        |        |        |
|--------|--------|--------|
| 1.250  | -18.21 | -43.36 |
| 1.200  | -36.41 | -54.36 |
| 1:150  | -57.26 | -57.19 |
| 1:100  | -64.12 | -80.08 |
| 1:50   | -68.34 | 89.45  |
| Loc 4B | 0.00   | 0.00   |
| 1.250  | -20.45 | -6.54  |
| 1.200  | -37.50 | -15.89 |
| 1:150  | -37.50 | -15.89 |
| 1:100  | -44.32 | -13.08 |
| 1:50   | -48.11 | -12.15 |
| Loc 5D | 0.00   | 0.00   |
| 1.250  | -12.97 | -31.34 |
| 1.200  | -20.00 | -32.84 |
| 1:150  | -32.97 | -22.39 |
| 1:100  | -37.30 | -61.94 |
| 1:50   | -42.16 | -23.88 |

1

2

1

2 **TABLE A-2: 1 & 7-Day Unconfined Compressive Strength**

3

| Loc      | Mix   | Weight (kg) Before Curing | Weight (kg) After Curing | Crushing Load (kg) |        | Compressive strength (KN/m <sup>2</sup> ) |        |
|----------|-------|---------------------------|--------------------------|--------------------|--------|-------------------------------------------|--------|
|          |       |                           |                          | 1 day              | 7 days | 1 day                                     | 7 days |
|          | 0     | 1.732                     | 1.601                    | 14                 | 45     | 21.1                                      | 69.0   |
| <b>1</b> | 1:250 | 1.612                     | 1.550                    | 18                 | 53     | 27.8                                      | 80.5   |
|          | 1:200 | 1.772                     | 1.566                    | 27                 | 85     | 41.2                                      | 129.3  |
|          | 1:150 | 1.785                     | 1.678                    | 31                 | 99     | 46.9                                      | 151.4  |
|          | 1:100 | 1.742                     | 1.609                    | 38                 | 118    | 58.4                                      | 180.1  |
|          | 1:50  | 1.742                     | 1.600                    | 35                 | 122    | 53.7                                      | 185.9  |
|          |       |                           |                          |                    |        |                                           |        |
| <b>2</b> | 0     | 1.698                     | 1.575                    | 15                 | 54     | 23.0                                      | 82.4   |
|          | 1:250 | 1.709                     | 1.614                    | 23                 | 76     | 35.5                                      | 115.9  |
|          | 1:200 | 1.694                     | 1.639                    | 36                 | 114    | 54.6                                      | 173.4  |
|          | 1:150 | 1.723                     | 1.629                    | 39                 | 116    | 59.4                                      | 177.2  |
|          | 1:100 | 1.754                     | 1.667                    | 37                 | 117    | 56.5                                      | 178.2  |
|          | 1:50  | 1.750                     | 1.640                    | 41                 | 120    | 62.3                                      |        |
|          |       |                           |                          |                    |        |                                           |        |
| <b>3</b> | 0     | 1.765                     | 1.624                    | 23                 | 85     | 35.5                                      | 129.3  |
|          | 1:250 | 1.760                     | 1.604                    | 33                 | 106    | 50.8                                      | 161.9  |
|          | 1:200 | 1.714                     | 1.538                    | 41                 | 130    | 62.3                                      | 198.3  |
|          | 1:150 | 1.728                     | 1.571                    | 37                 | 133    | 56.5                                      | 203.1  |
|          | 1:100 | 1.733                     | 1.580                    | 40                 | 135    | 61.3                                      | 205.0  |
|          | 1:50  | 1.757                     | 1.616                    | 45                 | 154    | 69.0                                      | 221.3  |
|          |       |                           |                          |                    |        |                                           |        |
| <b>4</b> | 0     | 1.736                     | 1.552                    | 15                 | 40     | 23.0                                      | 61.3   |
|          | 1:250 | 1.747                     | 1.563                    | 20                 | 62     | 30.7                                      | 94.8   |
|          | 1:200 | 1.760                     | 1.592                    | 32                 | 102    | 48.9                                      | 155.2  |
|          | 1:150 | 1.749                     | 1.600                    | 36                 | 105    | 54.6                                      | 160.0  |
|          | 1:100 | 1.766                     | 1.609                    | 40                 | 124    | 61.3                                      | 188.7  |

|          |       |       |       |    |     |      |       |
|----------|-------|-------|-------|----|-----|------|-------|
|          | 1:50  | 1.760 | 1.578 | 44 | 140 | 67.1 | 213.6 |
| <b>5</b> |       |       |       |    |     |      |       |
|          | 0     | 1.799 | 1.669 | 28 | 92  | 43.1 | 139.9 |
|          | 1:250 | 1.739 | 1.620 | 35 | 112 | 53.7 | 170.5 |
|          | 1:200 | 1.081 | 1.652 | 31 | 117 | 46.9 | 178.2 |
|          | 1:150 | 1.783 | 1.662 | 39 | 125 | 59.4 | 149.5 |
|          | 1:100 | 1.792 | 1.675 | 43 | 130 | 65.1 | 198.3 |
|          | 1:50  | 1.799 | 1.637 | 45 | 142 | 69.0 | 216.5 |

1  
2

1

2 **TABLE A-3:** Durability test (source: analysis of laboratory results)

3

| SAMPLE          | Weight Before Test (g) | Weight After Test (g) |      |     |       | Percentage Weight Loss After 4 Cycles % |
|-----------------|------------------------|-----------------------|------|-----|-------|-----------------------------------------|
|                 |                        | 1                     | 2    | 3   | 4     |                                         |
| <b>LOC 1- R</b> | 1762                   | 0                     | 0    | 0   | 0     | 100                                     |
| 1:250           | 1716                   | 1026                  | 620  | 25  | 0.629 | 62.9                                    |
| 1:200           | 1777                   | 1126                  | 596  | 106 | 0.551 | 55.1                                    |
| 1:150           | 1785                   | 1272                  | 623  | 36  | 0.559 | 44.1                                    |
| 1:100           | 1756                   | 1632                  | 1260 | 826 | 0.250 | 25.0                                    |
| 1:50            | 1743                   | 1608                  | 1461 | 890 | 0.196 | 19.6                                    |
|                 |                        |                       |      |     |       |                                         |
| <b>LOC 2- R</b> | 1698                   | 0                     | 0    | 0   | 0     | 100                                     |
| 1:250           | 1710                   | 1111                  | 520  | 180 | 0.470 | 47.0                                    |
| 1:200           | 1717                   | 1201                  | 580  | 96  | 0.454 | 45.4                                    |
| 1:150           | 1732                   | 1062                  | 796  | 126 | 0.289 | 28.9                                    |
| 1:100           | 1754                   | 1621                  | 1201 | 620 | 0.241 | 24.1                                    |
| 1:50            | 1767                   | 1682                  | 1362 | 300 | 0.210 | 21.0                                    |
|                 |                        |                       |      |     |       |                                         |
| <b>LOC 3-B</b>  | 1745                   | 0                     | 0    | 0   | 0     | 100                                     |
| 1:250           | 1752                   | 1216                  | 720  | 123 | 0.519 | 51.9                                    |
| 1:200           | 1732                   | 1086                  | 680  | 204 | 0.510 | 51.0                                    |
| 1:150           | 1750                   | 1080                  | 962  | 360 | 0.470 | 47.0                                    |
| 1:100           | 1745                   | 1460                  | 1160 | 820 | 0.438 | 43.8                                    |
| 1:50            | 1765                   | 1621                  | 1262 | 980 | 0.286 | 28.6                                    |
|                 |                        |                       |      |     |       |                                         |
| <b>LOC 4-B</b>  | 1736                   | 0                     | 0    | 0   | 0     | 100                                     |
| 1:250           | 1747                   | 1029                  | 420  | 33  | 0.541 | 54.1                                    |

|                |      |      |      |      |       |      |
|----------------|------|------|------|------|-------|------|
| 1:200          | 1756 | 1121 | 660  | 76   | 0.525 | 52.5 |
| 1:150          | 1745 | 1421 | 820  | 200  | 0.350 | 350  |
| 1:100          | 1760 | 1621 | 1226 | 820  | 0210  | 21.9 |
| 1:50           | 1768 | 1600 | 1321 | 1001 | 0.179 | 17.9 |
|                |      |      |      |      |       |      |
| <b>LOC 5-D</b> | 1717 | 0    | 0    | 0    | 0     | 100  |
| 1:250          | 1720 | 1212 | 786  | 46   | 0.544 | 54.4 |
| 1:200          | 1738 | 1306 | 840  | 201  | 0.481 | 48.1 |
| 1:150          | 1791 | 1436 | 1021 | 562  | 0.461 | 46.1 |
| 1:100          | 1782 | 1686 | 1314 | 1060 | 0.205 | 20.5 |
| 1:50           | 1796 | 1731 | 1456 | 1123 | 0.338 | 13.5 |
|                |      |      |      |      |       |      |

- 1
- 2

1

2 **TABLE A-4:** Summary of ANOVA tests **on** effects on nanomaterial on  
 3 engineering properties of active soil

| S/N | Engineering Property      | F Value | Conclusion                                                                                                                                                                                                                                                                                                                                                                                                                                                                                                                                                                                                                                                                                  |
|-----|---------------------------|---------|---------------------------------------------------------------------------------------------------------------------------------------------------------------------------------------------------------------------------------------------------------------------------------------------------------------------------------------------------------------------------------------------------------------------------------------------------------------------------------------------------------------------------------------------------------------------------------------------------------------------------------------------------------------------------------------------|
| 1   | Clay Content              | 23.13   | since the value of F (23.13) is greater than $F_{critical}(2.62)$ , then the addition of different proportions of nanomaterial to the soil has significant effect on clay content at 95% confidence limit                                                                                                                                                                                                                                                                                                                                                                                                                                                                                   |
| 2   | Liquid Limit (LL)         | 10.29   | since the value of F (10.29) is greater than $F_{critical}(2.62)$ , then the addition of different proportions of nanomaterial to the soil has significant effect on the liquid limit (LL) of the soils at 95% confidence limit.                                                                                                                                                                                                                                                                                                                                                                                                                                                            |
| 3   | Silt and Fines            | 6.01    | since the value of F (6.01) is greater than $F_{critical}(2.62)$ , then the addition of different proportions of nanomaterial to the soil has significant effect on silt and fines content at 95% confidence limit                                                                                                                                                                                                                                                                                                                                                                                                                                                                          |
| 4   | Soil Activity             | 11.48   | since the value of F (11.48) is greater than $F_{critical}(2.62)$ , then the addition of different proportions of nanomaterial to the soil has significant effect on activity of the soils at 95% confidence limit                                                                                                                                                                                                                                                                                                                                                                                                                                                                          |
| 5   | Shrinkage Limit           | 14.69   | since the value of F (14.69) is greater than $F_{critical}(2.62)$ , then the addition of different proportions of nanomaterial to the soil has significant effect on shrinkage limit at 95% confidence limit                                                                                                                                                                                                                                                                                                                                                                                                                                                                                |
| 6   | Moisture Content          | 2.66    | since the value of F (2.66) is greater than $F_{critical}(2.63)$ , then the addition of different proportions of nanomaterial to the soil has significant effect on optimum moisture content at 95% confidence limit, however to a much smaller extent than other parameters analyzed.                                                                                                                                                                                                                                                                                                                                                                                                      |
| 7   | Plastic Limit (PL)        | 3.2     | since the value of F (3.2) is greater than $F_{critical}(2.62)$ , then the addition of different proportions of nanomaterial to the soil has significant effect on plastic limit at 95% confidence limit, also to a smaller extent than other parameters apart from optimum moisture content.                                                                                                                                                                                                                                                                                                                                                                                               |
| 8   | Plasticity Index (PI)     | 25.88   | since the value of F (25.88) is greater than $F_{critical}(2.62)$ , then the addition of different proportions of nanomaterial to the soil has significant effect on plasticity index at 95% confidence limit                                                                                                                                                                                                                                                                                                                                                                                                                                                                               |
| 9   | Maximum Dry Density (MDD) | 1.01    | Since the value of F (1.01) is less than $F_{critical}(2.62)$ , then the addition of different proportions of nanomaterial to the soil has <b>NO</b> significant effect on maximum dry density at 95% confidence limit. The analysis was repeated for only soil samples without nanomaterial and those with the highest content of nanomaterial (1:50). The result in the table below (Table 5.13j) shows that even with the highest amount of nanomaterial used (1:50), there was no significant difference between the maximum dry density of the natural soil and the amended soil. Hence addition of nanomaterial up to 1:50 did not significantly improve the soil maximum dry density |
| 10  | CBR                       | 18.87   | since the value of F (18.87) is greater than $F_{critical}(2.62)$ , then the addition of different proportions of nanomaterial to the soil has significant effect on CBR at 95% confidence limit                                                                                                                                                                                                                                                                                                                                                                                                                                                                                            |

|    |                                                   |       |                                                                                                                                                                                                                                                                                                                                                                                                                                                                                                                                                                                                                                                                                           |
|----|---------------------------------------------------|-------|-------------------------------------------------------------------------------------------------------------------------------------------------------------------------------------------------------------------------------------------------------------------------------------------------------------------------------------------------------------------------------------------------------------------------------------------------------------------------------------------------------------------------------------------------------------------------------------------------------------------------------------------------------------------------------------------|
| 11 | Free Swell                                        | 20.42 | since the value of F (20.42) is greater than $F_{critical}(2.62)$ , then the addition of different proportions of nanomaterial to the soil has significant effect on free swell at 95% confidence limit                                                                                                                                                                                                                                                                                                                                                                                                                                                                                   |
| 12 | 7-Day Unconfined Compressive Strength (UCS7)      | 2.4   | since the value of F (2.4) is less than $F_{critical}(2.64)$ , then the addition of different proportions of nanomaterial to the soil has <b>NO</b> significant effect on 7 days unconfined compressive strength at 95% confidence limit. Hence, the analysis was repeated between the natural soil and the amended soil but only at nanomaterial content of 1:150 was a significant difference observed (see next table 5.12n below). Addition of nanomaterial from 1:250 to 1:200 did not significantly improve the seven days compressive strength. This implies that for the purposes of improving compressive strength nanomaterial content should be greater than or equal to 1:50. |
| 13 | 7-Day Unconfined Compressive Strength (1-Day UCS) | 0.4   | since the value of F (0.4) is less than $F_{critical}(2.62)$ , then the addition of different proportions of nanomaterial to the soil has <b>NO</b> significant effect on one day unconfined compressive strength at 95% confidence limit. Hence, the analysis was repeated between the natural soil and soils amended with different proportions of the nanomaterial. However, even at the maximum nanomaterial content of 1:50, there was no significant improvement in the 1 day compressive strength.                                                                                                                                                                                 |
| 14 | Percentage Swell (% Swell)                        | 7.81  | since the value of F (7.81) is greater than $F_{critical}(2.62)$ , then the addition of different proportions of nanomaterial to the soil has significant effect on % swell at 95% confidence limit                                                                                                                                                                                                                                                                                                                                                                                                                                                                                       |
| 15 | Water Absorption                                  | 6.78  | since the value of F (6.78) is greater than $F_{critical}(2.62)$ , then the addition of different proportions of nanomaterial to the soil has significant effect on water absorption at 95% confidence limit                                                                                                                                                                                                                                                                                                                                                                                                                                                                              |
|    |                                                   |       |                                                                                                                                                                                                                                                                                                                                                                                                                                                                                                                                                                                                                                                                                           |
